# Supplementary material for: U-shaped association of serum magnesium with mild cognitive impairment among hemodialysis patients: a multicenter study
Source: PubMed Central journal article supplement (PMC10334860; doi:10.1080/0886022x.2023.2231084), 2023-07-10
Supplement: IRNF_A_2231084_SM6260.pdf [file IRNF_A_2231084_SM6260.pdf]

**Table S1. Subgroup analyses of association between serum magnesium levels and mild cognitive impairment among HD patients**

| Serum magnesium<br>(mmol/L) | MCI*            |         | Serum magnesium<br>(mmol/L) | MCI*            |         |
|-----------------------------|-----------------|---------|-----------------------------|-----------------|---------|
|                             | OR(95%CI)       | P value |                             | OR(95%CI)       | P value |
| <b>Male</b>                 |                 |         | <b>No Smoking</b>           |                 |         |
| Q1 (0.41-0.83)              | 1.45(0.93,2.25) | 0.099   | Q1 (0.41-0.83)              | 1.41(0.97,2.05) | 0.074   |
| Q2 (0.84-1.04)              | 1.01(0.78,1.32) | 0.915   | Q2 (0.84-1.04)              | 1.17(0.94,1.45) | 0.164   |
| Q3 (1.05-1.18)              | 0.87(0.67,1.14) | 0.328   | Q3 (1.05-1.18)              | 0.88(0.69,1.10) | 0.261   |
| Q4 (1.19-1.45)              | Reference       |         | Q4 (1.19-1.45)              | Reference       |         |
| Q5 (1.46-2.78)              | 0.94(0.57,1.57) | 0.822   | Q5 (1.46-2.78)              | 1.27(0.85,1.90) | 0.237   |
| <b>Female</b>               |                 |         | <b>Smoking</b>              |                 |         |
| Q1 (0.41-0.83)              | 1.69(0.99,2.87) | 0.054   | Q1 (0.41-0.83)              | 2.71(1.27,5.76) | 0.010   |
| Q2 (0.84-1.04)              | 1.34(0.99,1.81) | 0.051   | Q2 (0.84-1.04)              | 1.16(0.73,1.84) | 0.543   |
| Q3 (1.05-1.18)              | 1.08(0.79,1.48) | 0.617   | Q3 (1.05-1.18)              | 1.48(0.95,2.31) | 0.083   |
| Q4 (1.19-1.45)              | Reference       |         | Q4 (1.19-1.45)              | Reference       |         |
| Q5 (1.46-2.78)              | 1.91(1.15,3.18) | 0.013   | Q5 (1.46-2.78)              | 1.67(0.78,3.56) | 0.186   |
| <b>Aged&lt;45 years</b>     |                 |         | <b>No Working</b>           |                 |         |
| Q1 (0.41-0.83)              | 1.96(0.94,4.07) | 0.073   | Q1 (0.41-0.83)              | 1.75(1.25,2.45) | 0.001   |
| Q2 (0.84-1.04)              | 1.12(0.74,1.70) | 0.597   | Q2 (0.84-1.04)              | 1.22(0.99,1.48) | 0.053   |
| Q3 (1.05-1.18)              | 0.93(0.61,1.41) | 0.728   | Q3 (1.05-1.18)              | 0.99(0.81,1.23) | 0.985   |
| Q4 (1.19-1.45)              | Reference       |         | Q4 (1.19-1.45)              | Reference       |         |
| Q5 (1.46-2.78)              | 1.26(0.64,2.46) | 0.504   | Q5 (1.46-2.78)              | 1.28(0.89,1.84) | 0.177   |
| <b>Age≥45 years</b>         |                 |         | <b>Working</b>              |                 |         |
| Q1 (0.41-0.83)              | 1.50(1.03,2.19) | 0.034   | Q1 (0.41-0.83)              | 0.93(0.15,5.88) | 0.935   |
| Q2 (0.84-1.04)              | 1.18(0.95,1.48) | 0.140   | Q2 (0.84-1.04)              | 0.88(0.34,2.28) | 0.793   |
| Q3 (1.05-1.18)              | 0.99(0.78,1.25) | 0.907   | Q3 (1.05-1.18)              | 0.69(0.26,1.84) | 0.453   |
| Q4 (1.19-1.45)              | Reference       |         | Q4 (1.19-1.45)              | Reference       |         |

|                            |                 |       |                        |                 |       |
|----------------------------|-----------------|-------|------------------------|-----------------|-------|
| Q5 (1.46-2.78)             | 1.34(0.88,2.04) | 0.168 | Q5 (1.46-2.78)         | 2.85(0.61,3.30) | 0.183 |
| <b>Low education</b>       |                 |       | <b>No Hypertension</b> |                 |       |
| Q1 (0.41-0.83)             | 1.70(1.17,2.74) | 0.005 | Q1 (0.41-0.83)         | 3.30(1.68,6.49) | 0.001 |
| Q2 (0.84-1.04)             | 1.23(0.98,1.53) | 0.073 | Q2 (0.84-1.04)         | 1.28(0.81,2.03) | 0.288 |
| Q3 (1.05-1.18)             | 1.02(0.81,1.28) | 0.895 | Q3 (1.05-1.18)         | 1.28(0.80,2.06) | 0.304 |
| Q4 (1.19-1.45)             | Reference       |       | Q4 (1.19-1.45)         | Reference       |       |
| Q5 (1.46-2.78)             | 1.30(0.88,1.92) | 0.192 | Q5 (1.46-2.78)         | 1.60(0.74,3.47) | 0.230 |
| <b>High education</b>      |                 |       | <b>Hypertension</b>    |                 |       |
| Q1 (0.41-0.83)             | 1.63(0.77,3.44) | 0.200 | Q1 (0.41-0.83)         | 1.24(0.83,1.84) | 0.289 |
| Q2 (0.84-1.04)             | 1.12(0.73,1.71) | 0.612 | Q2 (0.84-1.04)         | 1.10(0.88,1.38) | 0.401 |
| Q3 (1.05-1.18)             | 0.88(0.56,1.37) | 0.561 | Q3 (1.05-1.18)         | 0.89(0.71,1.12) | 0.324 |
| Q4 (1.19-1.45)             | Reference       |       | Q4 (1.19-1.45)         | Reference       |       |
| Q5 (1.46-2.78)             | 1.48(0.65,3.34) | 0.350 | Q5 (1.46-2.78)         | 1.27(0.85,1.88) | 0.246 |
| <b>Living with partner</b> |                 |       | <b>No Diabetes</b>     |                 |       |
| Q1 (0.41-0.83)             | 1.52(0.85,2.72) | 0.156 | Q1 (0.41-0.83)         | 1.94(1.29,2.93) | 0.002 |
| Q2 (0.84-1.04)             | 1.44(0.98,2.11) | 0.067 | Q2 (0.84-1.04)         | 1.22(0.96,1.54) | 0.101 |
| Q3 (1.05-1.18)             | 0.98(0.65,1.48) | 0.930 | Q3 (1.05-1.18)         | 1.03(0.81,1.31) | 0.814 |
| Q4 (1.19-1.45)             | Reference       |       | Q4 (1.19-1.45)         | Reference       |       |
| Q5 (1.46-2.78)             | 1.01(0.48,2.13) | 0.978 | Q5 (1.46-2.78)         | 1.63(1.09,2.44) | 0.018 |
| <b>Living alone</b>        |                 |       | <b>Diabetes</b>        |                 |       |
| Q1 (0.41-0.83)             | 1.68(1.10,2.54) | 0.015 | Q1 (0.41-0.83)         | 0.82(0.43,1.57) | 0.552 |
| Q2 (0.84-1.04)             | 1.05(0.83,1.33) | 0.687 | Q2 (0.84-1.04)         | 0.93(0.63,1.37) | 0.713 |
| Q3 (1.05-1.18)             | 0.95(0.75,1.21) | 0.698 | Q3 (1.05-1.18)         | 0.78(0.52,1.16) | 0.213 |
| Q4 (1.19-1.45)             | Reference       |       | Q4 (1.19-1.45)         | Reference       |       |
| Q5 (1.46-2.78)             | 1.43(0.96,2.12) | 0.081 | Q5 (1.46-2.78)         | 0.74(0.36,1.55) | 0.428 |

Note:  $P < 0.05$  was considered statistically significant. Abbreviations: HD, hemodialysis; OR, odds ratio; CI, confidence interval; MCI, mild cognitive

impairment. \* adjusted for age, sex, smoking, working, educational level, living status, Hypertension, diabetes, cerebrovascular disease, mean arterial pressure, waist-hip circumference ratio, serum uric acid, iPTH, and hs-CRP levels.
